1 **Title: The SARS-CoV-2 Omicron BA.1 spike G446S potentiates HLA-A\*24:02-**  
2 **restricted T cell immunity**

3  
4 **Authors:** Chihiro Motozono<sup>1,2\*</sup>, Mako Toyoda<sup>1</sup>, Toong Seng Tan<sup>1</sup>, Hiroshi Hamana<sup>3</sup>,  
5 Yoshiki Aritsu<sup>4</sup>, Yusuke Miyashita<sup>5, 6</sup>, Hiroyuki Oshiumi<sup>5</sup>, Kimitoshi Nakamura<sup>6</sup>, Seiji  
6 Okada<sup>7</sup>, Keiko Udaka<sup>8</sup>, Mizuki Kitamatsu<sup>4</sup>, Hiroyuki Kishi<sup>3</sup>, Takamasa Ueno<sup>1\*</sup>

7  
8 <sup>1</sup> Division of Infection and immunity, Joint Research Center for Human Retrovirus  
9 infection, Kumamoto University, Kumamoto 8600811, Japan

10 <sup>2</sup> Laboratory of Molecular Immunology, Immunology Frontier Research Center,  
11 Osaka University, Suita 5650871, Japan

12 <sup>3</sup> Department of Immunology, Faculty of Medicine, Academic Assembly, University  
13 of Toyama, Toyama 9300194, Japan

14 <sup>4</sup> Department of Applied Chemistry, Faculty of Science and Engineering, Kindai  
15 University, Osaka 577-8502, Japan

16 <sup>5</sup> Department of Immunology, Graduate School of Medical Sciences, Faculty of Life  
17 Sciences, Kumamoto University, Kumamoto 8608556, Japan

18 <sup>6</sup> Department of Pediatrics, Graduate School of Medical Sciences, Kumamoto  
19 University, Kumamoto 8608556, Japan

20 <sup>7</sup> Division of Hematopoiesis, Joint Research Center for Human Retrovirus Infection,  
21 Kumamoto University, Kumamoto 8600811, Japan

22 <sup>8</sup> Department of Immunology, Kochi University, Kochi 783-8505, Japan

23  
24 **\*Correspondences:**

25 [motozono@kumamoto-u.ac.jp](mailto:motozono@kumamoto-u.ac.jp) (C.M.)

26 [uenotaka@kumamoto-u.ac.jp](mailto:uenotaka@kumamoto-u.ac.jp) (T.U.)

27  
28 **Conflict of interest:** The authors declare that no competing interests exist.

29  
30 **Keywords:** SARS-CoV-2; COVID-19; Omicron BA.1; Omicron BA.2; spike protein;  
31 T cells; TCR; franking region

32

33 **Abstract (145/150 words)**

34 Although the Omicron variant of the SARS-CoV-2 virus is resistant to neutralizing  
35 antibodies, it retains susceptibility to cellular immunity. Here, we characterized  
36 vaccine-induced T cells specific for various SARS-CoV-2 variants and identified  
37 HLA-A\*24:02-restricted CD8<sup>+</sup> T cells that strongly suppressed Omicron BA.1  
38 replication. Mutagenesis analyses revealed that a G446S mutation, located just  
39 outside the N-terminus of the cognate epitope, augmented TCR recognition of this  
40 variant. In contrast, no enhanced suppression of replication was observed against  
41 cells infected with the prototype, Omicron BA.2, and Delta variants that express  
42 G446. The enhancing effect of the G446S mutation was lost when target cells were  
43 treated with inhibitors of tripeptidyl peptidase II, a protein that mediates antigen  
44 processing. These results demonstrate that the G446S mutation in the Omicron BA.1  
45 variant affects antigen processing/presentation and potentiates antiviral activity by  
46 vaccine-induced T cells, leading to enhanced T cell immunity towards emerging  
47 variants.  
48

## 49 **Introduction**

50 Current mRNA vaccines against the severe acute respiratory syndrome coronavirus  
51 2 (SARS-CoV-2) employ the viral spike protein as the target antigen. These vaccines  
52 elicit neutralizing antibodies and T-cell responses to the spike protein that play a  
53 central role in defending against viral infection and viral replication *in vivo*. The  
54 SARS-CoV-2 Omicron variant (BA.1; B.1.1.529.1), first identified in November 2021,  
55 is a novel variant that has rapidly spread around the globe. BA.1 has >30 mutations  
56 in the spike protein<sup>1</sup> that contribute to reduced sensitivity to vaccine-induced  
57 antibody neutralization<sup>2, 3, 4, 5, 6</sup>. In contrast, vaccine-induced SARS-CoV-2 specific T  
58 cells retain their reactivity to a number of different variants<sup>7, 8</sup>. Recent studies  
59 demonstrated that T cells induced in vaccinated donors can cross-recognize the  
60 Omicron variant<sup>8, 9, 10, 11, 12</sup>. However, the characteristics of vaccine-induced T cells  
61 cross-reactive for the Omicron virus are only poorly understood.

62 T cell epitopes are generated by the proteasome degradation of  
63 intracellular viral proteins into peptides that are subsequently trimmed by cytosolic  
64 aminopeptidases<sup>13</sup>. Some of these peptides are translocated via the transporter  
65 associated with antigen presentation (TAP) into the endoplasmic reticulum (ER)  
66 lumen and loaded onto HLA class I molecules. Peptide/HLA class I complexes are  
67 released from the ER and transported via the Golgi to the plasma membrane, where  
68 they are presented for recognition by CD8<sup>+</sup> T cells. Mutations within the peptide  
69 epitope directly affect HLA binding and T cell recognition. In addition, mutations  
70 outside the epitope can affect T cell recognition by interfering with the intracellular  
71 processing of virus-derived proteins<sup>13, 14</sup>. For example, a mutation from alanine to  
72 proline at HIV-1 Gag residue 146, immediately preceding the NH2 terminus of a  
73 dominant HLA-B57-restricted epitope, prevented NH2-terminal trimming of the  
74 optimal epitope by the endoplasmic reticulum aminopeptidase I<sup>14</sup>. These studies  
75 suggest that certain mutations located outside and nearby immunodominant  
76 epitopes may affect the T cell response to SARS-CoV-2 variants.

77 In this study, we demonstrated that a subset of vaccine-induced HLA-  
78 A\*24:02-restricted T cells exhibited enhanced reactivity against the Omicron BA.1  
79 variant. This enhanced reactivity was associated with a G446S mutation in the  
80 Omicron BA.1 spike protein that altered (enhanced) the processing and presentation  
81 of the associated antigenic peptide. Enhanced presentation of this epitope was also  
82 associated with greater inhibition of BA.1 replication by vaccine-induced T cells.

83

## 84 **Results**

### 85 **Vaccine-induced immunodominant responses in the context of HLA-A\*24:02**

86 HLA-A\*24:02 is one of the most widely distributed HLA-I alleles globally  
87 (predominantly in East Asia)<sup>15</sup>. A bioinformatic study identified three candidate HLA-  
88 A\*24:02-binding peptides in the spike protein, RFDNPVLPF (RF9; residues 78-86),  
89 NYNYLYRLF (NF9; residues 448-456), and QYIKWPWYI (QI9; residues 1208-1216)  
90<sup>16</sup>. All three peptides bound tightly to HLA-A\*24:02 (**Table 1**). To investigate vaccine-  
91 induced immunodominant responses in the context of HLA-A\*24:02, we obtained  
92 PBMCs from individuals that had been vaccinated with two doses of BNT162b2 or  
93 mRNA-1273 vaccines (n=29) (**Supplementary Table 1**). PBMC were stained with  
94 peptide/HLA tetramers of the three epitopes RF9/HLA-A\*24:02 (RF9/A24),  
95 NF9/HLA-A\*24:02 (NF9/A24), and QI9/HLA-A\*24:02 (QI9/A24) (**Fig. 1a and**  
96 **Extended Data Fig. 1a**). NF9/A24- and QI9/A24-specific T cells were detected in 10  
97 (34.5%) and 13 (44.8%), respectively, of 29 HLA-A\*24:02<sup>+</sup> vaccinated donors (**Fig.**  
98 **1b**). RF9/A24-specific T cells were detected in only 2 of 29 individuals (6.9%). These  
99 data indicate that CD8<sup>+</sup> T cells specific for NF9/A24 and QI9/A24 are predominantly  
100 induced in HLA-A\*24:02<sup>+</sup> vaccinated donors.

101 To analyze the recognition of SARS-CoV-2 variants by NF9/A24- and  
102 QI9/A24-specific T cells, we stimulated PBMCs from ten donors (GV9, 15, 16, 26,  
103 31, 33, 34, 36, 60, and 61) with the NF9 or QI9 peptides. After 14 days, proliferating  
104 T cells were evaluated for the upregulation of two activation markers, CD25 and  
105 CD137 (**Fig. 1c and Extended Data Fig. 1b**), as previously described<sup>15, 17, 18</sup>. The  
106 percentages of CD25<sup>+</sup>CD137<sup>+</sup> T cells after stimulation with the NF9 peptide (median  
107 3.5%) and QI9 peptide (median 4.5%) were significantly higher than those in the  
108 absence of the peptide (median <0.5%) (**Fig. 1d**, p = 0.0020 by Wilcoxon matched-  
109 pairs signed rank test; versus no peptide). There was no significant difference in the  
110 frequencies of NF9/A24 and QI9/A24-specific T cells (**Fig. 1d**, p = 0.6453 by Mann-  
111 Whitney test), consistent with the tetramer staining data (**Fig. 1b**). Taken together,  
112 our *ex vivo* and *in vitro* data indicate that NF9/A24 and QI9/A24 are immunodominant  
113 epitopes presented by HLA-A\*24:02 in BNT162b2 or mRNA-1273 vaccinated donors.  
114

### 115 **Vaccine-induced NF9/A24-specific T cells efficiently recognize target cells** 116 **expressing the Omicron BA.1 spike protein**

117 To analyze the recognition of the prototype (D614G-bearing B.1 lineage), Omicron  
118 BA.1, and Delta (B.1.617.2) variants by vaccine-induced HLA-A\*24:02-restricted T  
119 cells, we established T cell lines by stimulating of PBMCs from two HLA-A\*24:02<sup>+</sup>  
120 vaccinated donors (GV34 and GV60) with the NF9 or QI9 peptides (**Extended Data**  
121 **Fig. 1c, d, e**). The resulting T cell lines were tested for the recognition of A549-

122 ACE2-A2402 cells (**Extended Data Fig. 1f**) that had been engineered to express  
123 spike protein from the prototype, Omicron BA.1 or Delta variants. These target cell  
124 lines expressed comparable levels of spike protein, as determined by western blot  
125 (**Extended Data Fig. 1g**). Interestingly, the level of IFN- $\gamma$  production by the NF9-  
126 specific T cell lines from both donors was higher toward target cells expressing  
127 Omicron BA.1 spike protein and lower toward cells expressing Delta spike protein,  
128 compared to cells expressing the prototype spike protein (**Fig. 2a**). On the other  
129 hand, the level of IFN- $\gamma$  production by the QI9-specific T cell lines was comparable  
130 against target cells expressing Omicron BA.1, Delta, and prototype spike proteins  
131 (**Fig. 2b**). The enhanced sensitivity of NF9/A24-specific T cells to Omicron BA.1  
132 spike protein, compared to QI9/A24-specific T cells, was maintained at different E:T  
133 ratios (**Fig. 2c**). Analysis of a further six donors confirmed these results (**Fig. 2d**,  $p$   
134  $< 0.0001$  by Mann-Whitney test versus prototype). Of note, diminished T cell  
135 sensitivity against target cells expressing the Delta spike protein is due to the  
136 presence of an L452R mutation in the NF9 peptide, a hallmark of the Delta spike  
137 protein (**Table 2**). These data extend our previous analysis of T cell recognition of  
138 target cells pulsed with the mutant peptide by T cells from COVID-19  
139 convalescents<sup>15</sup> and vaccinated donors<sup>18</sup>. In contrast, there was no mutation within  
140 the NF9 epitope in Omicron BA.1 (**Table 2**), suggesting that Omicron BA.1 mutations  
141 of amino acid residues outside the NF9 peptide affect the sensitivity of the target  
142 cells to NF9/A24-specific T cells.

143

#### 144 **The G446S mutation in the SARS-CoV-2 Omicron BA.1 spike protein is** 145 **responsible for enhanced NF9/A24-specific TCR recognition**

146 We next identified TCR pairs specific for the NF9/A24 and QI9/A24 epitopes by  
147 single-cell sorting with NF9/A24 and QI9/A24 tetramers<sup>19</sup>. These studies focused on  
148 TCR sequences from 4 donors (**Supplementary Table 2**). Pairs of TCR  $\alpha$  and  $\beta$   
149 chains were reconstituted in a TCR-deficient NFAT-luciferase reporter cell line.  
150 TCRs specific for NF9/A24 (#5-3 and #12-3) and QI9/A24 (#43 and #57) were  
151 expressed on the cell surface and bound cognate tetramers at levels comparable to  
152 those of T cell lines (**Fig. 3a**). Both of the NF9/A24-specific TCR lines responded to  
153 cells expressing the Omicron BA.1 spike protein to a greater extent than those  
154 expressing the prototype, Alpha (B.1.1.7), Beta (B.1.351), and Gamma (P.1) spike  
155 proteins (**Fig. 3b**). These data indicate that the level of the NF9 peptide on the cell  
156 surface was enhanced in target cells expressing the Omicron BA.1 spike protein.  
157 Consistent with this, peptide-titration experiments using the #5-3 TCR indicated that  
158 the amount of NF9 peptide expressed on the target cells was almost 3-fold greater  
159 on cells expressing Omicron BA.1 spike protein than cells expressing the prototype

160 spike protein (**Extended Data Fig. 2a**). Also, the TCR responses were significantly  
161 reduced in cells expressing Delta and Lambda (C.37 lineage) spike protein, agreeing  
162 with our previous reports that L452R and L452Q in Delta and Lambda, respectively,  
163 mediate escape from vaccine-induced NF9/A24-specific T cells<sup>18</sup>. In contrast, both  
164 QI9/A24-specific TCRs responded comparably to cells expressing the spike protein  
165 from the prototype and variants (**Fig. 3b**).

166 It has been shown that mutations adjacent to T cell epitopes in HIV-1 can  
167 affect antigen processing and subsequent display to T cells<sup>14, 20, 21, 22</sup>. To  
168 determine whether this is also true for SARS-CoV-2 -specific T cells, we introduced  
169 mutations adjacent to the NF9 peptide sequence in BA.1 spike protein<sup>1</sup>. There are  
170 two mutations, N440K and G446S, located at 8 and 2 amino acids preceding the  
171 NF9 peptide sequence in Omicron BA.1 spike protein (**Table 2**). Therefore, we  
172 sought to examine whether N440K or G446S could enhance epitope recognition by  
173 NF9/A24-specific T cells.

174 The introduction of both mutations, or the G446S mutation alone, to the  
175 prototype spike protein, resulted in significantly enhanced recognition by NF9/A24-  
176 specific TCRs. In contrast, the introduction of N440K alone and reversion of the  
177 sequence (S446G) in Omicron BA.1 spike protein was recognized by NF9/A24-  
178 specific TCRs at levels similar to those induced by the prototype spike protein (**Fig.**  
179 **3c**). Moreover, QI9/A24-specific TCRs comparably recognized all target cells tested,  
180 consistent with a comparable level of spike protein expression, as determined by  
181 western blot (**Extended Data Fig. 2b**). Taken together, our findings indicate that the  
182 N-terminal adjacent G446S mutation of the NF9 epitope in Omicron BA.1 spike  
183 protein is responsible for enhancing NF9/A24-specific TCR recognition.

184

185 **Enhanced T cell recognition is diminished against Omicron BA.2 spike protein**  
186 **due to the lack of the G446S mutation.**

187 The SARS-CoV-2 Omicron variant (B.1.1529) is comprised of three major lineages  
188 BA.1 (B.1.1529.1), BA.2 (B.1.1529.2), and BA.3 (B.1.1529.3)<sup>1</sup>. Following the initial  
189 spread of BA.1, BA.2 is now becoming the prevalent variant as of April 2022.  
190 Because the G446S mutation is lost in Omicron BA.2, we investigated the  
191 recognition of Omicron BA.2 by NF9-specific T cells. BA.2 spike protein-expressing  
192 cells were recognized by NF9/A24-specific TCRs to a lesser extent than those  
193 expressing BA.1 spike protein, and comparable to those expressing the prototype  
194 (**Fig. 3b**). Furthermore, NF9-specific T cells from eight vaccinated HLA-A\*24:02<sup>+</sup>  
195 donors exhibited decreased levels of IFN- $\gamma$  in response to stimulation with target  
196 cells expressing Omicron BA.2 spike protein, similar to the levels elicited by the  
197 Omicron BA.1 reversion S446G (**Fig. 3d**,  $p = 0.0002$  and  $p = 0.0078$  by Mann-

198 Whitney test versus Omicron BA.2, Omicron BA.1/S446G, respectively). In contrast,  
199 QI9-specific T cells from the same donors produced comparable levels of IFN- $\gamma$  in  
200 response to stimulation with target cells expressing all spike proteins tested (**Fig.**  
201 **3d**). Together, these data suggest that the introduction of a serine at position 446 of  
202 Omicron BA.1 spike protein is sufficient to induce enhanced T cell recognition of the  
203 NF9 epitope. This enhanced recognition is diminished against Omicron BA.2 spike  
204 protein due to the absence of the G446S mutation.

205

### 206 **Tripeptidyl peptidase II (TPPII) inhibitor reduces the enhanced recognition of** 207 **the NF9 epitope**

208 To determine how the G446S mutation affects the antigen processing pathway, we  
209 performed a TCR-sensitivity assay using Omicron BA.1 spike protein-expressing  
210 target cells pre-treated with a panel of protease inhibitors that are involved in N-  
211 terminal processing/trimming of the peptide; e.g., bestatin (aminopeptidase inhibitor),  
212 butabindide (tripeptidyl peptidase II inhibitor) and ERAP1 inhibitor compound 3<sup>13</sup>.  
213 The enhanced sensitivity of NF9/A24-specific TCRs to Omicron BA.1 spike by (GV34  
214 #5-3, Vku19 #12-3, and GV34 #2-2) was significantly reduced in the presence of  
215 TPPII inhibitor (**Fig. 3e**,  $p = 0.0456$  by Mann-Whitney test versus DMSO alone),  
216 although there was no difference in the sensitivity of QI9/A24-specific TCRs (GV34  
217 #43, GV33 #57 and GV36 #10-2). These data suggest that TPPII might be one of  
218 the proteases involved in the efficient generation of the NF9 epitope.

219

### 220 **NF9-specific T cells efficiently suppress the replication of Omicron BA.1, but** 221 **not the BA.2, viral variants**

222 We next investigated whether NF9-specific T cells have a superior capacity to  
223 suppress the replication of the Omicron BA.1 viral variant. A549 cells expressing  
224 ACE2/A2402 were infected with SARS-CoV-2 viral variants and cocultured with T  
225 cell lines specific for NF9/A24 and QI9/A24. Suppression of viral replication by T  
226 cells is evaluated by the amount of viral RNA in the supernatant at 72 h after infection.  
227 NF9/A24 and QI9/A24-specific T cells isolated from donor GV36, significantly  
228 inhibited replication of the prototype virus at 72 h (**Fig. 4a**,  $p = 0.009$  and  $p = 0.0036$   
229 versus without T cells by unpaired two-tailed Student's t-test). NF9-specific T cells  
230 isolated from donors GV26, GV36, and GV60 also suppressed replication of  
231 Omicron BA.1 variant replication to a greater extent than the prototype or Omicron  
232 BA.2 (**Fig. 4b**). No suppression was observed against the Delta variant (**Fig. 4b**),  
233 presumably due to the T cell escape mutation L452R in the Delta spike protein (**Fig.**  
234 **2c and 2d**). On the other hand, QI9-specific T cells comparably suppressed viral  
235 replication of prototype and these variants in all three donors tested (**Fig. 4c**). We

236 also tested the antiviral activity of T cells from three additional donors and confirmed  
237 that NF9-specific T cells have the capacity to inhibit Omicron BA.1, but not BA.2  
238 replication to a greater extent than the prototype. These data indicate that vaccine-  
239 induced T cells can have an enhanced capacity to recognize and suppress emerging  
240 SARS-CoV-2 BA.1 variant.  
241



## 242 **Discussion**

243 In this study, we report that vaccine-induced HLA-A\*24:02-restricted, NF9-specific T  
244 cells efficiently recognize target cells expressing the Omicron BA.1 spike protein and  
245 strongly suppress viral replication of the Omicron BA.1 variant compared to the  
246 prototype virus. The G446S mutation in Omicron BA.1 spike protein, located  
247 adjacent to the N terminus of the NF9 epitope (residues 448-456), is responsible for  
248 the efficient generation of the epitope. This is presumably due to enhanced antigen  
249 processing and presentation of the epitope. These data indicate that vaccine-  
250 induced T cells can have an enhanced capacity to cross recognize and suppress  
251 emerging SARS-CoV-2 variants.

252 The generation of HLA class I-restricted peptides is profoundly influenced  
253 by amino acid variations, not only within, but also around the core epitope. Changes  
254 in the epitope-flanking region can result in the inhibition of epitope presentation or a  
255 significant increase in the generation of the epitope<sup>22</sup>. In our study, we used a TCR-  
256 based quantification assay to demonstrate that the presentation of the NF9 epitope  
257 on the surface of Omicron BA.1 spike protein-expressing cells was estimated to be  
258 almost 3-fold increased relative to that of the prototype. The finding that T cell  
259 recognition of NF9 epitope was reduced when the Omicron BA.1 spike protein-  
260 expressing target cells were pre-treated with butabindide, an inhibitor of TPPII,  
261 suggested that generation of NF9 epitope requires TPPII-mediated removal of 2-3  
262 amino acids from the N terminus of the peptide as TPPII is known to mediate this  
263 process<sup>23</sup>. This finding is consistent with reports that the flanking regions of some  
264 HIV-1 epitopes impact proteasomal processing of the epitope<sup>14, 20</sup>. Further studies  
265 are needed to clarify how mutations in the spike protein and other proteins in SARS-  
266 CoV-2 variants affect antigen processing/presentation for T cell recognition,  
267 providing better insights for the rational design of vaccine antigens to induce efficient  
268 cellular immunity.

269 We and others previously reported that the NF9 is an immunodominant  
270 epitope presented by HLA-A\*24:02 both in convalescent<sup>15, 24, 25, 26, 27, 28</sup> and  
271 vaccinated donors<sup>18</sup>. However, the L452R and L452Q mutations in Delta/Epsilon  
272 and Lambda variants, respectively, conferred escape from NF9-specific T cell  
273 responses<sup>15, 18</sup>. In contrast, in this study, we demonstrated that NF9-specific T cells  
274 efficiently recognized target cells expressing Omicron BA.1 spike protein and  
275 suppressed viral replication of the Omicron BA.1 variant to a greater extent than that  
276 of the prototype. Interestingly, however, NF9-specific T cells only recognized and  
277 suppressed viral replication of the closely related variant Omicron BA.2 comparable  
278 to the prototype. This is presumably due to the absence of G446S mutation in BA.2  
279 and prototype. It will be interesting to see whether vaccine-induced T cells respond

280 comparably, or differently, or control replication of SARS-CoV-2 variants of concern  
281 in the context of HLA-A\*24:02 in vaccinated donors.

282 IFN- $\gamma$  ELISpot or AIM (Activation-Induced marker) assays using  
283 overlapping peptides are powerful methods to evaluate the breadth of T cell  
284 responses to overall viral proteins in vaccinated and COVID-19 convalescent  
285 donors<sup>29, 30</sup>. Recent studies using these assays have demonstrated that T cells in  
286 vaccinated donors and convalescents can cross-recognize Omicron variants<sup>8, 9, 11, 12</sup>.  
287 However, these assays do not reveal antiviral functions of individual T cells against  
288 variants of concern, including the Omicron variant and the effect of mutations on  
289 antigen processing/presentation in virus-infected cells. Here, we found that a  
290 mutation located outside the epitope could enhance the antiviral activity of vaccine-  
291 induced T cells against the Omicron BA.1 variant. Thus, the antiviral assay for T cells  
292 demonstrated in this study will be tremendously useful for future vaccine  
293 development, and the combination of this quantitative assay with quantity assays by  
294 ELISpot assays would be important to access vaccine efficacy against variants.  
295

296 **Author Contributions:**

297 C.M M.T T.S.T K.U performed the experiments.

298 Y.M K.N H.O S.O collected clinical samples.

299 H.H Y.A M.K H.K prepared reagents.

300 C.M M.T T.S.T T.U designed the experiments and interpreted the results.

301 C.M T.U wrote the original manuscript.

302 All authors reviewed and proofread the manuscript.

303

304 **Acknowledgments:**

305 We would like to thank all members of the Genotype to Phenotype Japan (G2P-  
306 Japan) Consortium, especially Drs. Kei Sato (The University of Tokyo), Terumasa  
307 Ikeda (Kumamoto University) for providing plasmids, reagents, and cells, and Dr.  
308 Kazuhisa Yoshimura (Tokyo Metropolitan Institute of Public Health) and Drs.  
309 Tomohiko Takasaki and Jun-Ichi Sakuragi (Kanagawa Prefectural Institute of Public  
310 Health) for providing viruses. We thank Dr. Masafumi Takiguchi (Kumamoto  
311 University) for providing C1R-A2402 cells. We thank Dr. David L. Woodland for  
312 assistance in editing the manuscript. This study was supported in part by AMED  
313 Research Program on Emerging and Re-emerging Infectious Diseases  
314 20fk0108539h0001 (to T.U.) and 20fk0108451s0101 (to T.U.) and AMED Research  
315 Program on HIV/AIDS 21fk0410046 (to C.M.), JSPS KAKENHI Grant-in-Aid for  
316 Scientific Research B 19H03703, 22H03119 (to T.U.) and 22H02877 (to C.M.),  
317 Scientific Research C 19K07623 (to C.M.) and 22K07089 (to M.T.), Takeda Science  
318 Foundation (to C.M. and M.T) and an intramural grant from Kumamoto University  
319 COVID-19 Research Projects (AMABIE) (to C.M.), IMAI MEMORIAL TRUST FOR  
320 AIDS RESERARCH (to M.T.), Shin-Nihon Foundation of Advanced Medical  
321 Research (to M.T.).

322

323

## 324 References

- 325 1. Viana, R. *et al.* Rapid epidemic expansion of the SARS-CoV-2 Omicron  
326 variant in southern Africa. *Nature* (2022).
- 327 2. Cele, S. *et al.* Omicron extensively but incompletely escapes Pfizer  
328 BNT162b2 neutralization. *Nature* (2021).
- 329 3. Cameroni, E. *et al.* Broadly neutralizing antibodies overcome SARS-CoV-2  
330 Omicron antigenic shift. *Nature* (2021).
- 331 4. Cao, Y. *et al.* Omicron escapes the majority of existing SARS-CoV-2  
332 neutralizing antibodies. *Nature* (2021).
- 333 5. Planas, D. *et al.* Considerable escape of SARS-CoV-2 Omicron to antibody  
334 neutralization. *Nature* (2021).
- 335 6. Meng, B. *et al.* Altered TMPRSS2 usage by SARS-CoV-2 Omicron impacts  
336 tropism and fusogenicity. *Nature* (2022).
- 337 7. Tarke, A. *et al.* Impact of SARS-CoV-2 variants on the total CD4(+) and  
338 CD8(+) T cell reactivity in infected or vaccinated individuals. *Cell Rep Med* **2**,  
339 100355 (2021).
- 340 8. Tarke, A. *et al.* SARS-CoV-2 vaccination induces immunological T cell  
341 memory able to cross-recognize variants from Alpha to Omicron. *Cell* (2022).
- 342 9. Keeton, R. *et al.* T cell responses to SARS-CoV-2 spike cross-recognize  
343 Omicron. *Nature* (2022).
- 344 10. GeurtsvanKessel, C.H. *et al.* Divergent SARS CoV-2 Omicron-reactive T- and  
345 B cell responses in COVID-19 vaccine recipients. *Sci Immunol*, eabo2202  
346 (2022).
- 347 11. Gao, Y. *et al.* Ancestral SARS-CoV-2-specific T cells cross-recognize the  
348 Omicron variant. *Nat Med* (2022).
- 349 12. Naranbhai, V. *et al.* T cell reactivity to the SARS-CoV-2 Omicron variant is  
350 preserved in most but not all individuals. *Cell* **185**, 1041-1051 e1046 (2022).
- 351 13. Neefjes, J., Jongsma, M.L., Paul, P. & Bakke, O. Towards a systems  
352 understanding of MHC class I and MHC class II antigen presentation. *Nat Rev*  
353 *Immunol* **11**, 823-836 (2011).
- 354 14. Draenert, R. *et al.* Immune selection for altered antigen processing leads to  
355 cytotoxic T lymphocyte escape in chronic HIV-1 infection. *J Exp Med* **199**,  
356 905-915 (2004).
- 357 15. Motozono, C. *et al.* SARS-CoV-2 spike L452R variant evades cellular  
358 immunity and increases infectivity. *Cell Host Microbe* **29**, 1124-1136 (2021).
- 359 16. Kiyotani, K., Toyoshima, Y., Nemoto, K. & Nakamura, Y. Bioinformatic  
360 prediction of potential T cell epitopes for SARS-Cov-2. *J Hum Genet* **65**, 569-  
361 575 (2020).

- 362 17. Wolfl, M. *et al.* Activation-induced expression of CD137 permits detection,  
363 isolation, and expansion of the full repertoire of CD8<sup>+</sup> T cells responding to  
364 antigen without requiring knowledge of epitope specificities. *Blood* **110**, 201-  
365 210 (2007).
- 366 18. Kimura, I. *et al.* The SARS-CoV-2 Lambda variant exhibits enhanced  
367 infectivity and immune resistance. *Cell Rep* **38**, 110218 (2022).
- 368 19. Hamana, H., Shitaoka, K., Kishi, H., Ozawa, T. & Muraguchi, A. A novel, rapid  
369 and efficient method of cloning functional antigen-specific T-cell receptors  
370 from single human and mouse T-cells. *Biochem Biophys Res Commun* **474**,  
371 709-714 (2016).
- 372 20. Milicic, A. *et al.* CD8<sup>+</sup> T cell epitope-flanking mutations disrupt proteasomal  
373 processing of HIV-1 Nef. *J Immunol* **175**, 4618-4626 (2005).
- 374 21. Le Gall, S., Stamegna, P. & Walker, B.D. Portable flanking sequences  
375 modulate CTL epitope processing. *J Clin Invest* **117**, 3563-3575 (2007).
- 376 22. Del Val, M., Schlicht, H.J., Ruppert, T., Reddehase, M.J. & Koszinowski, U.H.  
377 Efficient processing of an antigenic sequence for presentation by MHC class  
378 I molecules depends on its neighboring residues in the protein. *Cell* **66**, 1145-  
379 1153 (1991).
- 380 23. Tomkinson, B. Tripeptidyl peptidases: enzymes that count. *Trends Biochem*  
381 *Sci* **24**, 355-359 (1999).
- 382 24. Gao, A. *et al.* Learning from HIV-1 to predict the immunogenicity of T cell  
383 epitopes in SARS-COV-2. *iScience*, 102311 (2021).
- 384 25. Hu, C. *et al.* Identification of Cross-Reactive CD8(+) T Cell Receptors with  
385 High Functional Avidity to a SARS-CoV-2 Immunodominant Epitope and Its  
386 Natural Mutant Variants. *Genes Dis* (2021).
- 387 26. Kared, H. *et al.* SARS-CoV-2-specific CD8<sup>+</sup> T cell responses in convalescent  
388 COVID-19 individuals. *J Clin Invest* **131** (2021).
- 389 27. Rowntree, L.C. *et al.* SARS-CoV-2-specific CD8(+) T-cell responses and TCR  
390 signatures in the context of a prominent HLA-A\*24:02 allomorph. *Immunol*  
391 *Cell Biol* (2021).
- 392 28. Zhang, H. *et al.* Profiling CD8(+) T cell epitopes of COVID-19 convalescents  
393 reveals reduced cellular immune responses to SARS-CoV-2 variants. *Cell*  
394 *Rep* **36**, 109708 (2021).
- 395 29. Grifoni, A. *et al.* Targets of T Cell Responses to SARS-CoV-2 Coronavirus in  
396 Humans with COVID-19 Disease and Unexposed Individuals. *Cell* **181**, 1489-  
397 1501 e1415 (2020).
- 398 30. Peng, Y. *et al.* Broad and strong memory CD4(+) and CD8(+) T cells induced  
399 by SARS-CoV-2 in UK convalescent individuals following COVID-19. *Nat*

- 400            *Immunol* **21**, 1336-1345 (2020).
- 401    31.    Karaki, S. *et al.* HLA-B51 transgenic mice as recipients for production of  
402            polymorphic HLA-A, B-specific antibodies. *Immunogenetics* **37**, 139-142  
403            (1993).
- 404    32.    Mashiba, T. *et al.* Identification of CTL epitopes in hepatitis C virus by a  
405            genome-wide computational scanning and a rational design of peptide  
406            vaccine. *Immunogenetics* **59**, 197-209 (2007).
- 407    33.    Dolton, G. *et al.* More tricks with tetramers: a practical guide to staining T cells  
408            with peptide-MHC multimers. *Immunology* **146**, 11-22 (2015).
- 409    34.    Suzuki, R. *et al.* Attenuated fusogenicity and pathogenicity of SARS-CoV-2  
410            Omicron variant. *Nature* **603**, 700-705 (2022).
- 411    35.    Yamasoba, D. *et al.* Virological characteristics of SARS-CoV-2 BA.2 variant.  
412            *bioRxiv*, 2022.2002.2014.480335 (2022).
- 413    36.    Tan, T.S., Toyoda, M., Tokunaga, K. & Ueno, T. Aromatic Side Chain at  
414            Position 412 of SERINC5 Exerts Restriction Activity toward HIV-1 and Other  
415            Retroviruses. *J Virol* **95**, e0063421 (2021).
- 416    37.    Miyama, T. *et al.* Highly functional T-cell receptor repertoires are abundant in  
417            stem memory T cells and highly shared among individuals. *Sci Rep* **7**, 3663  
418            (2017).
- 419    38.    Giudicelli, V., Brochet, X. & Lefranc, M.P. IMGT/V-QUEST: IMGT  
420            standardized analysis of the immunoglobulin (IG) and T cell receptor (TR)  
421            nucleotide sequences. *Cold Spring Harb Protoc* **2011**, 695-715 (2011).
- 422
- 423

424 **Figure legends**

425 **Fig. 1 | Detection of HLA-A\*24:02-restricted antigen-specific T cells in**  
426 **vaccinated donors.**

427 (a and b) Detection of HLA-A\*24:02-restricted antigen-specific T cells in PBMCs by  
428 HLA tetramers. a, Representative FACS plots showing tetramer<sup>+</sup> CD8<sup>+</sup> T cells of an  
429 HLA-A24-negative vaccinated donor, GV17 (upper), and an HLA-A24-positive  
430 vaccinated donor, GV16 (lower). See also **Extended Data Fig. 1a** (Gating strategy).  
431 b, The median of the percentage of RF9/A24, NF9/A24, and QI9/A24 tetramer<sup>+</sup>CD8<sup>+</sup>  
432 T cells. c and d, Detection of HLA-A\*24:02-restricted antigen-specific T cell lines *in*  
433 *vitro*. c, Representative FACS plots showing surface expression of CD25 and CD137  
434 on the CD8<sup>+</sup> T cell subset of a vaccinated donor, GV60. See also **Extended Data**  
435 **Fig. 1b** (Gating strategy). d, The median of the percentage of CD25<sup>+</sup>CD137<sup>+</sup> cells  
436 among CD8<sup>+</sup> T cells. See also **Supplementary Table 1** (donor information). In a  
437 and c, the numbers in the FACS plot represent the percentage of gated cells among  
438 CD8<sup>+</sup> T cells. In b, the median of % tetramer<sup>+</sup> population in HLA-A24 negative donors  
439 was <0.05%. HLA-A24<sup>+</sup> donors showing a >0.1% tetramer<sup>+</sup> response were  
440 considered to be responders. In d, a statistically significant difference versus value  
441 without peptide (\*p < 0.05) is determined by Wilcoxon matched-pairs signed rank,  
442 and versus peptide is determined by Mann-Whitney test. ns, no statistical  
443 significance.

444

445 **Fig. 2 | T cell recognition to target cells expressing variant spike protein.**

446 (a and b) HLA-A24-positive T cell lines of vaccinated donors were stimulated with  
447 A549-ACE/A2402 (**Extended Data Fig. 1f**) expressing spike protein derived from  
448 prototype, Omicron, and Delta variants. Representative FACS plots showing  
449 intracellular expression of IFN- $\gamma$  in the NF9-specific CD8<sup>+</sup> T cells (a) and QI9-specific  
450 CD8<sup>+</sup> T cells (b) in two vaccinated donors (GV34 and GV60). c, The level of IFN- $\gamma$   
451 production of NF9- and QI9-specific T cells in response to spike-expressing target  
452 cells in two vaccinated donors, GV34 (upper) and GV60 (lower). Data represent the  
453 mean of triplicates. d, Fold changes in IFN- $\gamma$  expression by NF9-specific T cells (left)  
454 and QI9-specific T cells (right) compared to the target cells expressing prototype  
455 spike in eight vaccinated donors (GV15, 26, 31, 33, 34, 36, 60, and 61) are shown.  
456 In a and b, the numbers in the FACS plot represent the percentage of IFN- $\gamma$ <sup>+</sup> cells  
457 among CD8<sup>+</sup> T cells. In d, a statistically significant difference versus prototype spike  
458 (\*p < 0.05) is determined by a Mann-Whitney test. ns, no statistical significance.

459

460 **Fig. 3 | Identification of mutation associated with increased TCR sensitivity.**

461 TCR-peptide/HLA interaction on a TCR-transduced Jurkat NFAT-luciferase reporter  
462 cell. **a**, Jurkat cells alone (shaded histogram) or those expressing NF9/A24-specific  
463 TCRs (#5-3 and #12-3) or QI9/A24-specific TCRs (#43 and #57) (open histogram)  
464 were stained with anti-CD3 mAb and their cognate HLA-A24 tetramers and then  
465 analyzed by flow cytometry. **b and c**, the level of peptide/HLA complexes was  
466 evaluated by NFAT-luciferase reporter activity of TCR-transduced Jurkat cells. Data  
467 of NF9/A24-specific TCRs (**b**) and QI9/A24-specific TCRs (**c**) are shown. Fold  
468 changes of reporter activity by NF9/A24- and QI9/A24-specific TCRs compared to  
469 the target cells expressing prototype spike protein are shown. (**d**) Fold changes of  
470 IFN- $\gamma$  by NF9-specific T cells (left) and QI9-specific T cells (right) compared to the  
471 target cells expressing Omicron BA.1 spike protein in eight vaccinated donors (GV15,  
472 26, 31, 33, 34, 36, 60 and 61) are shown. A statistically significant difference versus  
473 Omicron BA.1 spike (\* $p < 0.05$ ) is determined Mann-Whitney test. ns, no statistical  
474 significance. (**e**) The level of peptide/HLA complexes is evaluated following  
475 treatment with inhibitors, bestatin (120  $\mu$ M), butabindide (150  $\mu$ M), and ERAP1  
476 inhibitor (50  $\mu$ M). The effect of inhibitors was evaluated as reporter activity and  
477 shown by fold change of the level of peptide/HLA on target cells expressing Omicron  
478 BA.1 reversion S446G spike protein. Statistical analysis versus DMSO alone was  
479 determined by Mann-Whitney test. **b, c** Statistical analysis versus parental was done  
480 by unpaired two-tailed Student's t-test. ns, no statistical significance. **b, c** Data are  
481 expressed as mean  $\pm$  SD. **d, e** Data are expressed as a median. **b, c, e** Data are  
482 representative of three independent experiments.

483

484 **Fig. 4 | Inhibition of SARS-CoV-2 viral replication by HLA-A24-restricted T cell**  
485 **lines from vaccinated donors.**

486 (**a**) Viral replication of the prototype in the presence of NF9- or QI9-specific T cells  
487 from GV36, or without T cells. **b and c**, Inhibition of viral replication by NF9-specific  
488 T cells (**b**) and QI9-specific T cells (**c**) compared to without T cells in three vaccinated  
489 donors are shown. In **a**, a statistically significant difference versus without T cells (\* $p$   
490  $< 0.05$ ) was determined by an unpaired two-tailed Student's t-test. In **b** and **c**, a  
491 statistically significant difference versus prototype (\* $p < 0.05$ ) was determined by a  
492 Mann-Whitney test. ns, no statistical significance. **a-c** Data are representative of two  
493 independent experiments.

494

495 **Table 1** Binding of spike-derived epitopes to HLA-A\*24:02

496

497 **Table 2** Spike-derived HLA-A24-restricted NF9 epitopes and the N-terminal

498 flanking region from the variant





500 **Extended Data Fig. 1.** Gating strategy and T cell and cell lines used in this study  
501 (a-c) Flow cytometry gating strategy of tetramer staining in PBMCs from donor GV16  
502 (a), CD25<sup>+</sup>CD137<sup>+</sup> activated T cell lines from donor GV60 (b) and tetramer staining  
503 of T cell lines from GV60 (c). (d) NF9 and QI9 stimulated-T cell lines used in this  
504 study. (e) IFN- $\gamma$  production in peptide titration of the NF9 and QI9 peptide in T cell  
505 lines from GV34 and GV60 donors. (f) GFP expression of A549-ACE2-A2402-IRES-  
506 GFP cells. A549-ACE2 parental (shaded histogram) and FACS-sorted A549-ACE2-  
507 A2402-IRES-GFP cells (open histogram) are shown. (g) Western blot.  
508 Representative blots of cells expressing prototype, Omicron BA.1, and Delta spike  
509 (S) protein.

510  
511 **Extended Data Fig. 2.** (a) TCR sensitivity of GV34 #5-3 toward cells expressing  
512 spike protein and peptide-pulsed target cells. (b) Representative western blots of  
513 cells expressing various spike (S) proteins.

514  
515 **Supplementary Table 1.** Human PBMCs used in this study, related to Fig. 1.

516  
517 **Supplementary Table 2.** TCR sequences isolated from NF9/A24- and QI9/A24-  
518 specific T cells by single-cell analysis, related to Fig. 3.

519  
520 **Supplementary Table 3.** Primers for the construction of spike derivatives, related  
521 to Fig. 3.

522  
523

524 **Methods**

525

526 **Ethics Statement**

527 For the use of human specimens, all protocols involving human subjects recruited at  
528 Kumamoto University were reviewed and approved by the Institutional Review  
529 Boards of Kumamoto University (approval numbers 2074 and 477). All human  
530 subjects provided written informed consent.

531

532 **Collection of human PBMCs**

533 Human PBMCs were obtained from thirty HLA-A\*24:02-positive BNT162b2 or  
534 mRNA-1273 vaccinated donors (median age: 24, range: 18-79, 67% male), five  
535 HLA-A\*24:02-negative BNT162b2-vaccinated donors (median age: 24, range: 18-  
536 28, 60% Female) (**Supplementary Table 1**). PBMCs were purified by a density  
537 gradient centrifugation using Ficoll-Paque Plus (GE Healthcare Life Sciences, Cat#  
538 17-1440-03) and stored in liquid nitrogen until further use.

539

540 **Cell Culture**

541 A549-ACE2/A2402 cells, the A549 cells stably expressing human ACE2 and HLA-  
542 A\*24:02-IRES-GFP, were generated by retroviral transduction as previously  
543 described<sup>15, 19</sup> and were maintained in Ham's-F12 (Wako, Cat# 080-08565)  
544 containing 10% fetal bovine serum (FBS). C1R cells expressing HLA-A\*24:02 (C1R-  
545 A2402)<sup>31</sup> and TCR-deficient Jurkat cells expressing luciferase gene (Jurkat $\Delta$ -Luc)  
546 were maintained in RPMI 1640 medium (Thermo Fisher Scientific, Cat# 11875101)  
547 containing 10% FBS.

548

549 **Virus**

550 Four clinically isolated SARS-CoV-2 lineages were used: SARS-CoV-2 Wuhan  
551 strain [SARS-CoV-2/Hu/DP/Kng/19-020 (DDBJ Accession ID: LC528232)], was  
552 provided from Kanagawa Prefectural Institute of Public Health. A B.1.617.2 (Delta)  
553 lineage [hCoV 19/Japan/TKYK01734/2021 (GISAID Accession ID:  
554 EPI\_ISL\_2080609)], and a B.1.1.529 (Omicron/BA.1) lineage [hCoV hCoV-  
555 19/Japan/TKYX00012/2021 (GISAID Accession ID: EPI\_ISL\_8559478)] were  
556 provided from Tokyo Metropolitan Institute of Public Health, Tokyo, Japan. B.1.1.529  
557 (Omicron/BA.2) lineage [hCoV hCoV-19/Japan/TY40-385-P1/2022 (GISAID  
558 Accession ID: EPI\_ISL\_9595859)] were provided from National Institute of Infectious  
559 Diseases, Tokyo, Japan.

560

561 **The peptide-dependent stabilization assay**

562 The HLA binding of peptide was analyzed as previously described<sup>32</sup>. Briefly, TAP-  
563 deficient C1R-A24 cells were incubated at 26 °C overnight. A total of  $1 \times 10^5$  cells  
564 was incubated with 1  $\mu$ M  $\beta$ 2-microglobulin ( $\beta$ 2m) and graded concentrations of  
565 peptides in 96-well U-bottom plates. Cells were incubated at 26 °C for 1 h and then  
566 at 37 °C for 4 h. At the end of the incubation, unbound peptides were removed, and  
567 cells were stained with twice the saturating concentration of the first antibodies. After  
568 staining with FITC-labeled F(ab')<sub>2</sub> goat anti-mouse IgG (Leinco), cells were analyzed  
569 by FACScan (BD, San Jose, CA, USA). The mean fluorescence intensity (MFI) was  
570 calculated with Cell Quest<sup>TM</sup>, and the mean values of duplicates were presented.  
571 Peptide binding is normalized by high-binder peptide (TYLPTNASL) and low-binder  
572 peptide (RVWESATPL) in each experiment.

573

#### 574 **Tetramer staining**

575 SARS-CoV-2-derived peptides-loaded MHC class I (pMHCI) tetramers were  
576 generated by QuickSwitch<sup>TM</sup> Quant HLA-A\*24:02 Tetramer Kit-PE (MBL  
577 International Corporation, Cat# TB-7302-K1) according to the manufacturer's  
578 protocol. The rate of peptide exchange was quantitated by flow cytometry, and the  
579 tetramers, at a rate of more than 90%, were used for staining PBMCs as previously  
580 described<sup>33</sup>. After treatment with a protein kinase inhibitor, Dasatinib (Cat# A10290-  
581 25, AdooQ) for 30 min at 37°C, PBMCs were stained with tetramers for 30 min on  
582 ice. After tetramer staining, cells were counterstained with anti-PE unconjugated  
583 mAb (Cat# 408104, Biolegend) for 20 min on ice and surface stained with the  
584 following antibodies: CD3 BV421 (UCHT1), CD8 APCcy7 (RPA-T8), CD14  
585 PerCP/Cy5.5 (HCD14), CD19 PerCP/Cy5.5 (HIB19; Biolegend) was performed.  
586 Dead cells were stained with 7-aminoactinomycin D (Biolegend, Cat# 420404). After  
587 incubation for 20 min on ice, the cells were fixed with 1% paraformaldehyde (Nacalai  
588 Tesque, Cat# 09154-85), and the levels of tetramer<sup>+</sup>CD8<sup>+</sup> T cells were analyzed by  
589 flow cytometry using a FACS Canto II (BD Biosciences). The data obtained by flow  
590 cytometry were analyzed with FlowJo software (Tree Star).

591

#### 592 **Activation-Induced Marker Assay**

593 An activation-induced marker assay was performed as previously described<sup>15, 17</sup>.  
594 Briefly, human PBMCs were pulsed with 100 nM of the NF9 peptide (NYNLYRLF,  
595 residues 448-456 of the SARS-CoV-2 spike protein) and the QI9 peptide  
596 (QYIKWPWYI, residues 1208-1216 of the SARS-CoV-2 spike protein) maintained in  
597 RPMI 1640 medium (Thermo Fisher Scientific, Cat# 11875101) containing 10% FBS  
598 and 30 U/ml recombinant human IL-2 (Peprotec, Cat# 200-02) for 14 days. The *in-*  
599 *vitro* expanded CD8<sup>+</sup> T cells (i.e., T cell lines) were restimulated with or without the

600 peptide. After incubation at 37°C for 24 h, the cells were washed, and surface stained  
601 with following antibodies: CD3 FITC (UCHT1), CD8 APCcy7 (RPA-T8), CD14  
602 PerCP/Cy5.5 (HCD14), CD19 PerCP/Cy5.5 (HIB19), CD25 PEcy7 (M-A251) and  
603 CD137 APC (4B4-1; Biolegend). Dead cells were stained with 7-aminoactinomycin  
604 D (Biolegend, Cat# 420404). After incubation for 20 min on ice, the cells were fixed  
605 with 1% paraformaldehyde (Nacalai Tesque, Cat# 09154-85), and the levels of  
606 protein surface expression were analyzed by flow cytometry using a FACS Canto II  
607 (BD Biosciences). The data obtained by flow cytometry were analyzed with FlowJo  
608 software (Tree Star).

609

### 610 **Plasmid Construction**

611 Plasmids expressing the SARS-CoV-2 spike proteins of the parental (D614G-  
612 bearing B.1 lineage), Alpha (B.1.1.7), Beta (B.1.351), Gamma (P.1), Lambda (C.37  
613 lineage) and Delta (B.1.617.2), Omicron BA.1 (B.1.1529.1), and Omicron BA.2  
614 (B.1.1529.2) variant were prepared in our previous studies<sup>18, 34, 35</sup>. Plasmids  
615 expressing the point mutants were generated by site-directed overlap extension  
616 PCR using pC-SARS2-spike D614G or SARS2-Omicron-spike as the template and  
617 the following primers listed in **Supplementary Table 3**. Primers for the construction  
618 of spike derivatives, related to Fig. 2 and 3. The resulting PCR fragment was  
619 digested with KpnI and NotI and inserted into the corresponding site of the pCAGGS  
620 vector. Nucleotide sequences were determined by Genetic Analyzer 3500xL  
621 (Applied Biosystems) and the sequence data were analyzed by GENETYX v12  
622 (GENETYX Corporation).

623

### 624 **Intracellular Cytokine Staining**

625 Intracellular cytokine staining was performed as previously described<sup>15</sup>. Briefly,  
626 A549-ACE2-A2402 cells ( $3 \times 10^5$  cells) were transfected with 2  $\mu$ g of plasmids  
627 expressing prototype spike or its derivatives using PEI Max (Polysciences, Cat#  
628 24765-1) according to the manufacturer's protocol. At two days post transfection, the  
629 transfectants were harvested and mixed with the T cell lines generated from HLA-  
630 A\*24:02<sup>+</sup> vaccinated donors (see above) and incubated with RPMI 1640 medium  
631 (Thermo Fisher Scientific, Cat# 11875101) containing 10% FBS, 5  $\mu$ g/ml brefeldin A  
632 (Sigma-Aldrich, Cat# B7651) in a 96-well U plate at 37°C for 5 h. The cells were  
633 washed, and surface stained with following antibodies: CD3 FITC (UCHT1), CD8  
634 APCcy7 (RPA-T8), CD14 PerCP/Cy5.5 (HCD14), CD19 PerCP/Cy5.5 (HIB19;  
635 Biolegend). Dead cells were stained with 7-aminoactinomycin D (Biolegend, Cat#  
636 420404). After incubation at 4°C for 20 min, the cells were fixed and permeabilized  
637 with a Cytotfix/Cytoperm Fixation/Permeabilization solution kit (BD Biosciences, Cat#

638 554714) and were stained with IFN- $\gamma$  PE (4S.B3; BD). After incubation at room  
639 temperature for 30 min, the cells were washed, and levels of protein expression were  
640 analyzed by flow cytometry using a FACS Canto II (BD Biosciences) followed by  
641 analysis using FlowJo software (Tree Star).

642

### 643 **Western blotting**

644 The samples for immunoblotting were prepared as described previously<sup>36</sup> with some  
645 modifications. Briefly, transfected cells were lysed on ice for 15 min in a buffer (100  
646 mM NaCl, 1 mM TCEP [Tris (2-carboxyethyl) phosphine hydrochloride], 2X protease  
647 inhibitor, and 10 mM HEPES; pH 7.5) containing 1% n-dodecyl-b-D-maltoside (DDM;  
648 Thermo Scientific). The resultant samples were resuspended in 1X Laemmli buffer  
649 containing 5%  $\beta$ -Mercaptoethanol (Bio-Rad), boiled for 10 min and subjected to  
650 protein separation by SDS-PAGE in 4 – 20% Mini-PROTEAN TGX precast gels (Bio-  
651 Rad) before transferred to nitrocellulose membranes (Wako). The membranes were  
652 incubated in a blocking buffer (Nacalai Tesque) for 1 h at room temperature and then  
653 mixed with primary antibodies, including rabbit anti-SARS-CoV-2 Spike (S1/S2)  
654 polyclonal antibody (1:2,000; Invitrogen) and mouse anti- $\beta$ -actin monoclonal  
655 antibody (1:5,000; Wako), followed by staining with the horseradish peroxidase  
656 (HRP)-conjugated anti-rabbit (1:50,000; GE healthcare) and anti-mouse (1:25,000;  
657 GE healthcare) IgG secondary antibodies. The membrane was developed with the  
658 ImmunoStar LD enhanced chemiluminescence reagents (Wako) and visualized  
659 using ImageQuant LAS 400 (GE Healthcare).

660

### 661 **Jurkat reporter cell (Jurkat $\Delta$ -Luc) for functional analysis of TCRs**

662 DNA fragment of NFAT-RE-Luc2P-SV40 pro-HygroR was amplified from pGL4.3  
663 (Promega) by PCR. The DNA fragment was cloned into Stu I/Sal I site of PiggyBac  
664 vector PB530A-2 (SBI) by Gibson assembly method. The resultant vector  
665 [PB\_NFAT-RE-Luc2P-SV40 pro-HygroR] was electroporated into endogenous TCR  
666 knocked-out Jurkat cells<sup>37</sup> with Transposase expression vector PB200PA-1 (SBI).  
667 To select Jurkat reporter cell (Jurkat $\Delta$ -Luc) integrated with NFAT-RE-Luc2P-SV40  
668 pro-HygroR, Hygromycin-B selection was performed at 500 ug/ml concentration for  
669 14 days.

670

### 671 **TCR cDNA amplification from single T cells and construction of TCR 672 expression vector**

673 The cryopreserved PBMCs were stained with NF9/A24 and QI9/A24 tetramers, anti-  
674 CD8 mAb (RPA-T8; Biolegend), and 7-amino-actinomycin D (7-AAD), and then  
675 tetramer<sup>+</sup>CD8<sup>+</sup>7-AAD<sup>-</sup> cells were sorted into 96-well plates (NIPPON Genetics, Cat#

676 4ti-0770/C) by using an FACS Aria II (BD Biosciences). TCR $\alpha$  and TCR $\beta$  cDNA pairs  
677 were amplified from single T cells by a one-step multiplex RT-PCR method described  
678 in our previous study<sup>19</sup>. The DNA sequences of the PCR products were then  
679 analyzed by direct sequencing and the TCR repertoire by IMGT/V-QUEST  
680 ([https://www.imgt.org/IMGT\\_vquest/vquest](https://www.imgt.org/IMGT_vquest/vquest))<sup>38</sup>. The amplified TCR $\alpha$  and TCR $\beta$  cDNA  
681 fragments were connected to the missing constant region and linked to the blasticidin  
682 S resistance (BlaR) gene by the Gibson assembly method with P2A ribosomal  
683 skipping sequences. Resultant TCR $\beta$ -P2A-TCR $\alpha$ -P2A-BlaR DNA was cloned into  
684 the PiggyBac vector (SBI, Cat# PB530A-2) by the Gibson assembly method.

685

### 686 **TCR sensitivity assay**

687 The plasmid PB TCR-P2A-BlaR was electroporated into Jurkat $\Delta$ -Luc with  
688 Transposase vector (SBI, Cat# PB200PA-1) using Neon<sup>®</sup> Transfection System  
689 (Thermo Fisher Scientific) under the condition 1200v, 5 ms, 5 pulses. After 48 h,  
690 Jurkat $\Delta$ -Luc cells stably expressing TCRs were selected with RPMI medium  
691 containing 10  $\mu$ g/ml of blasticidin-S for 10-14 days. These cells were cocultured with  
692 A549-ACE2-A2402 cells expressing each spike protein an E:T ratio of 2:1 and  
693 incubated with RPMI 1640 medium (Thermo Fisher Scientific, Cat# 11875101)  
694 containing 10% FBS at 37°C for 6 h. The mixture was measured for luciferase  
695 production using a luminescent substrate (Promega, Cat#E2510).

696

### 697 **Live virus suppression assay**

698 A549 cells expressing ACE2/A2402 ( $1 \times 10^4$  cells) were infected with each SARS-  
699 CoV-2 lineage at an MOI of 0.1 for 120 min at 37 °C. Cells were washed and  
700 cocultured with T cells at an E:T ratio of 2:1 and 1:1. Control wells containing virus-  
701 infected targets without T cells were also included. After 72 h incubation, culture  
702 supernatant was collected and performed real-time RT-PCR. 5  $\mu$ l of culture  
703 supernatant was lysed in an equal amount buffer composed of 2% Triton X-100, 50  
704 mM KCl, 100 mM Tris-HCl (pH 7.4), 40% glycerol and 0.4 U/ $\mu$ l recombinant RNase  
705 inhibitor (Promega, Cat# N2615) and then incubated at room temperature for 10 min.  
706 90  $\mu$ l of RNase-free water (Nacalai tesque, Cat# 06442-95) was added, and 3  $\mu$ l of  
707 diluted sample was used as the template. Real-time RT-PCR analyses for viral RNA  
708 copy number was carried out with One Step PrimeScript<sup>™</sup> III RT-qPCR Mix (Takara,  
709 Cat# RR600B) and reactions were performed by using LightCycler<sup>®</sup> 96 System  
710 (Roche Diagnostics GmbH, Mannheim, Germany). For the primer, Primer/Probe N2  
711 (2019-nCoV) (Takara, Cat# XD0008) were used as follows: NIID\_2019-nCoV\_N\_  
712 forward, 5-AAATTTTGGGGACCAGGAAC-3; NIID\_2019-nCoV\_N\_ reverse, 5-  
713 TGGCAGCTGTGTAGGTCAAC-3; and NIID\_2019-nCoV\_N\_ probe, 5-FAM-

714 ATGTCGCGCATTGGCATGGA-BHQ3. The viral RNA copy number was  
715 standardized with a Positive Control RNA Mix (2019-nCoV) (Takara, Cat#XA0142).  
716 Relative viral copy was calculated as viral RNA copy number obtained by virus-  
717 infected targets without T cells normalized to 1.

718

719 **QUANTIFICATION AND STATISTICAL ANALYSIS**

720 Data analyses were performed using Prism 9 (GraphPad Software). Data are  
721 presented as median or average with SD.

722



**Fig. 1**

bioRxiv preprint doi: <https://doi.org/10.1101/2022.04.17.488095>; this version posted April 18, 2022. The copyright holder for this preprint (which was not certified by peer review) is the author/funder, who has granted bioRxiv a license to display the preprint in perpetuity. It is made available under aCC-BY-NC-ND 4.0 International license.

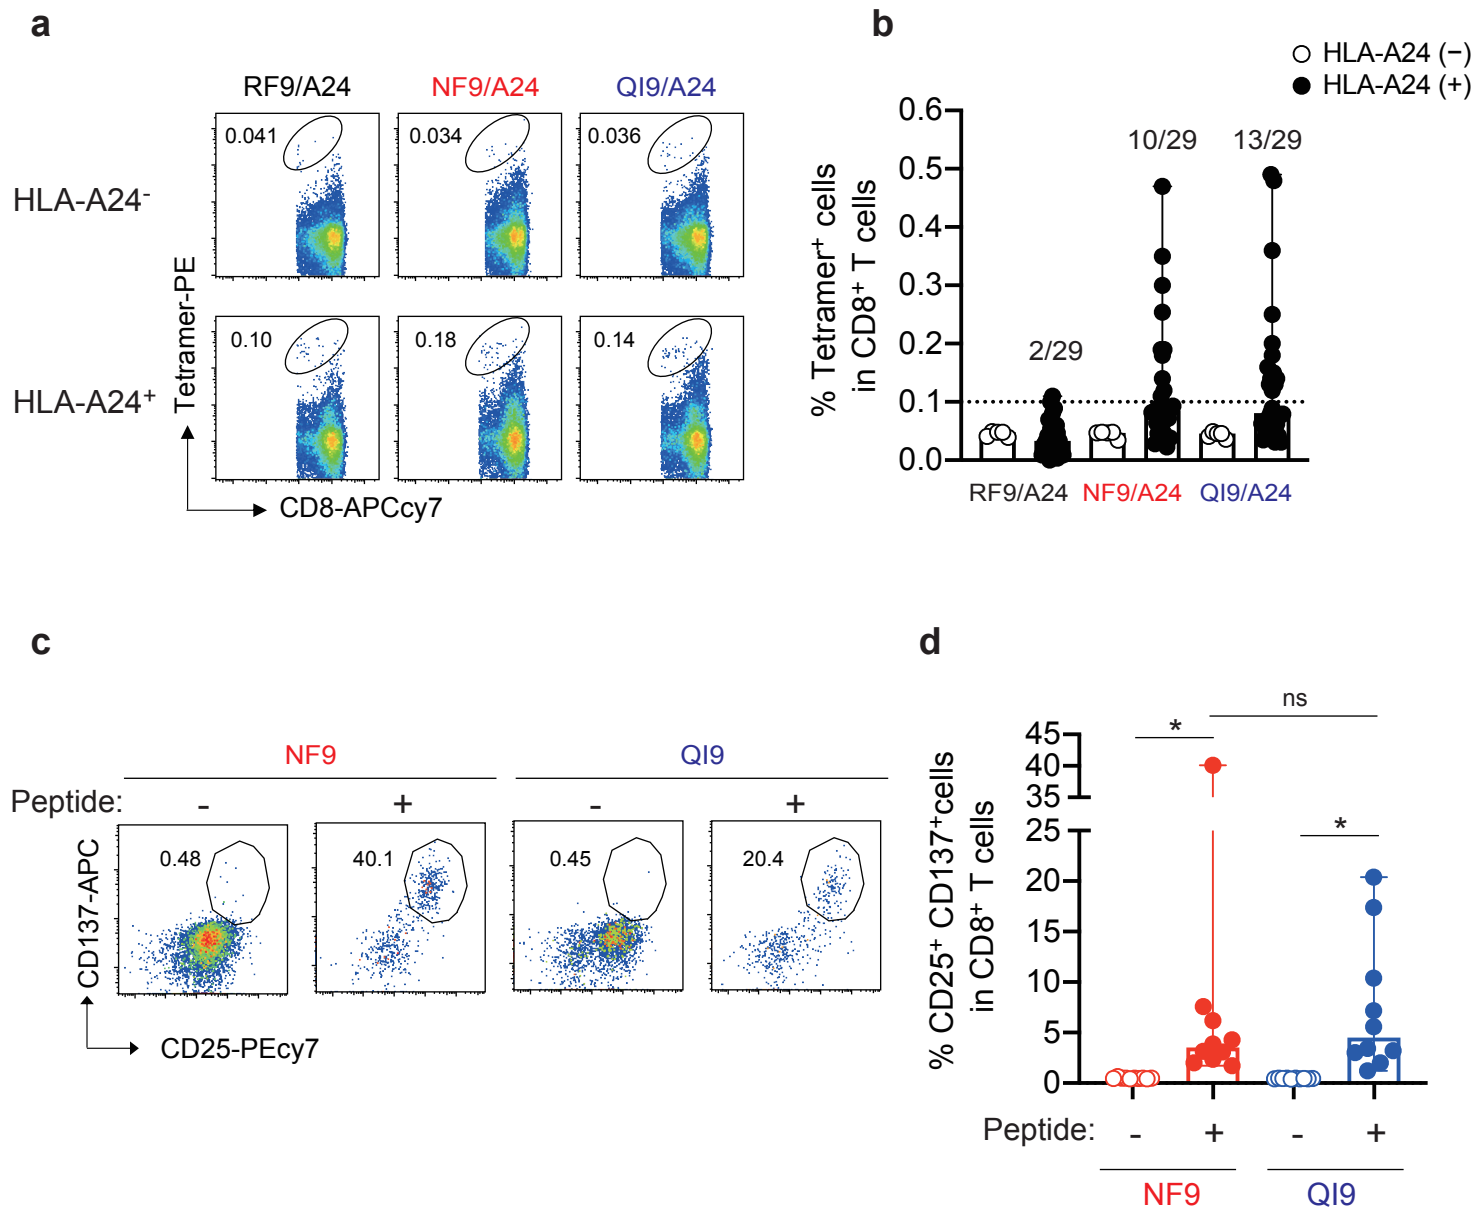

# Fig. 2

bioRxiv preprint doi: <https://doi.org/10.1101/2022.04.17.488095>; this version posted April 18, 2022. The copyright holder for this preprint (which was not certified by peer review) is the author/funder, who has granted bioRxiv a license to display the preprint in perpetuity. It is made available under aCC-BY-NC-ND 4.0 International license.

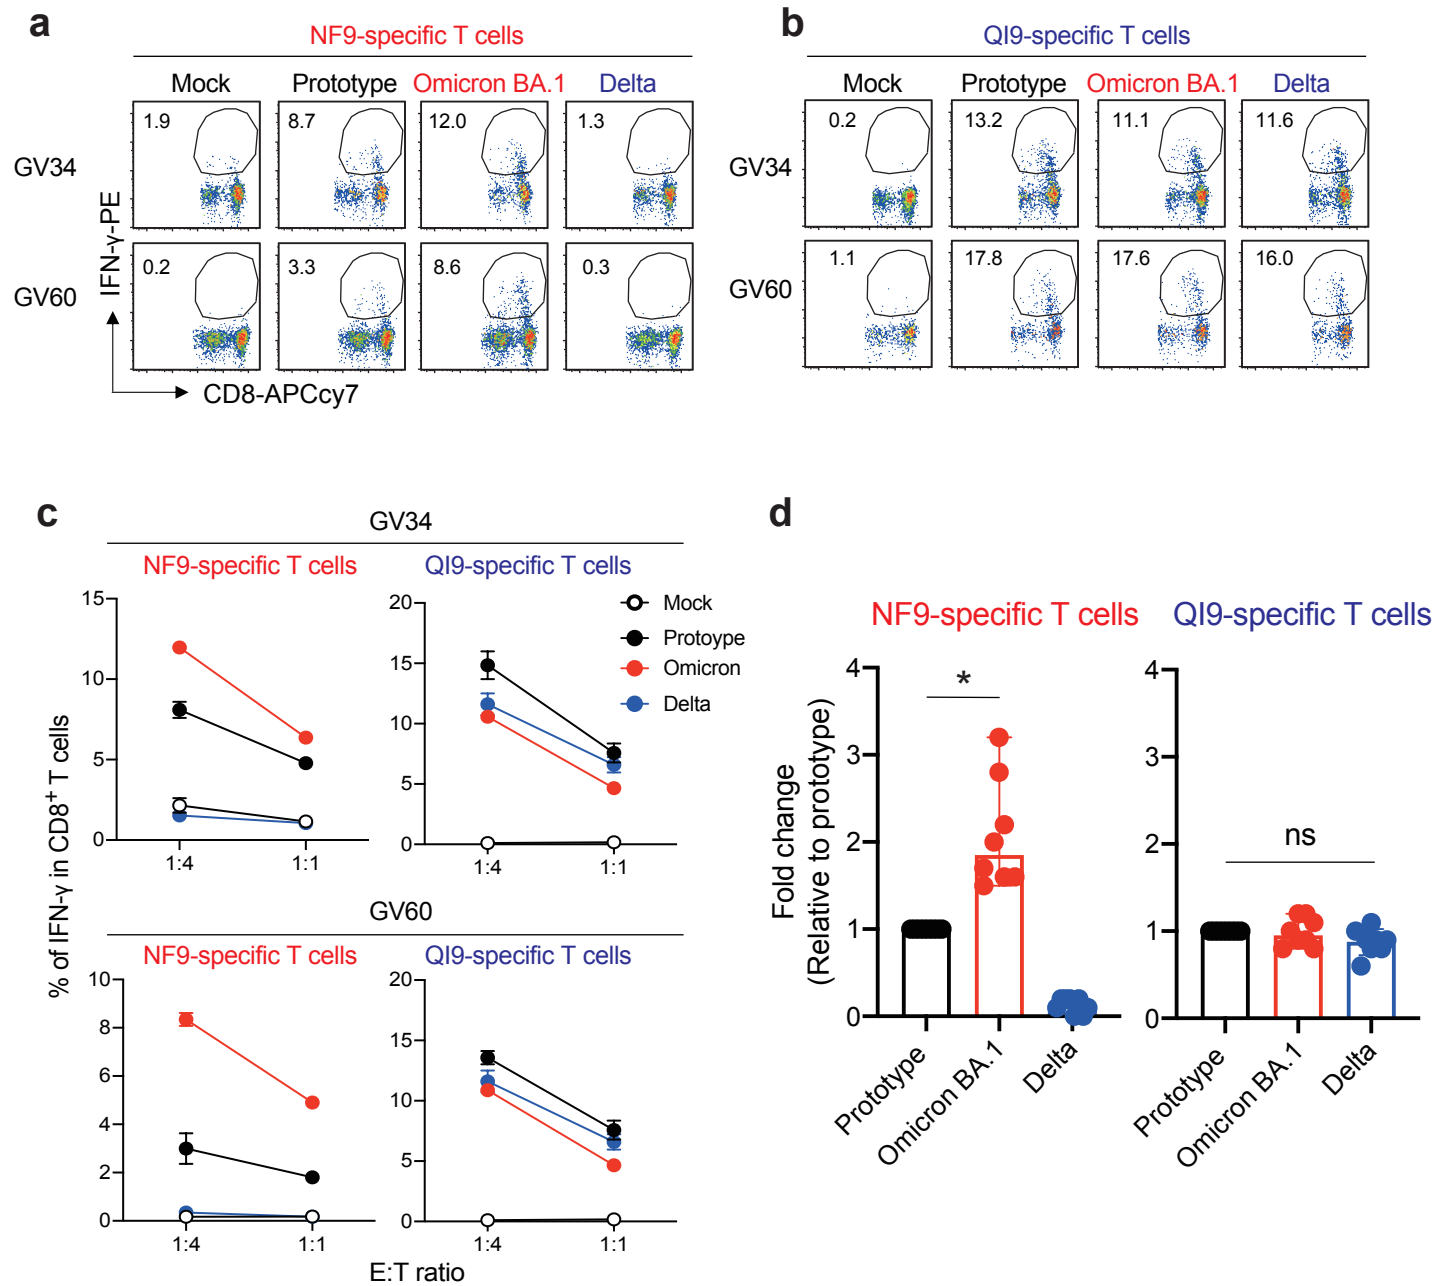

# Fig. 3

bioRxiv preprint doi: <https://doi.org/10.1101/2022.04.17.488095>; this version posted April 18, 2022. The copyright holder for this preprint (which was not certified by peer review) is the author/funder, who has granted bioRxiv a license to display the preprint in perpetuity. It is made available under aCC-BY-NC-ND 4.0 International license.

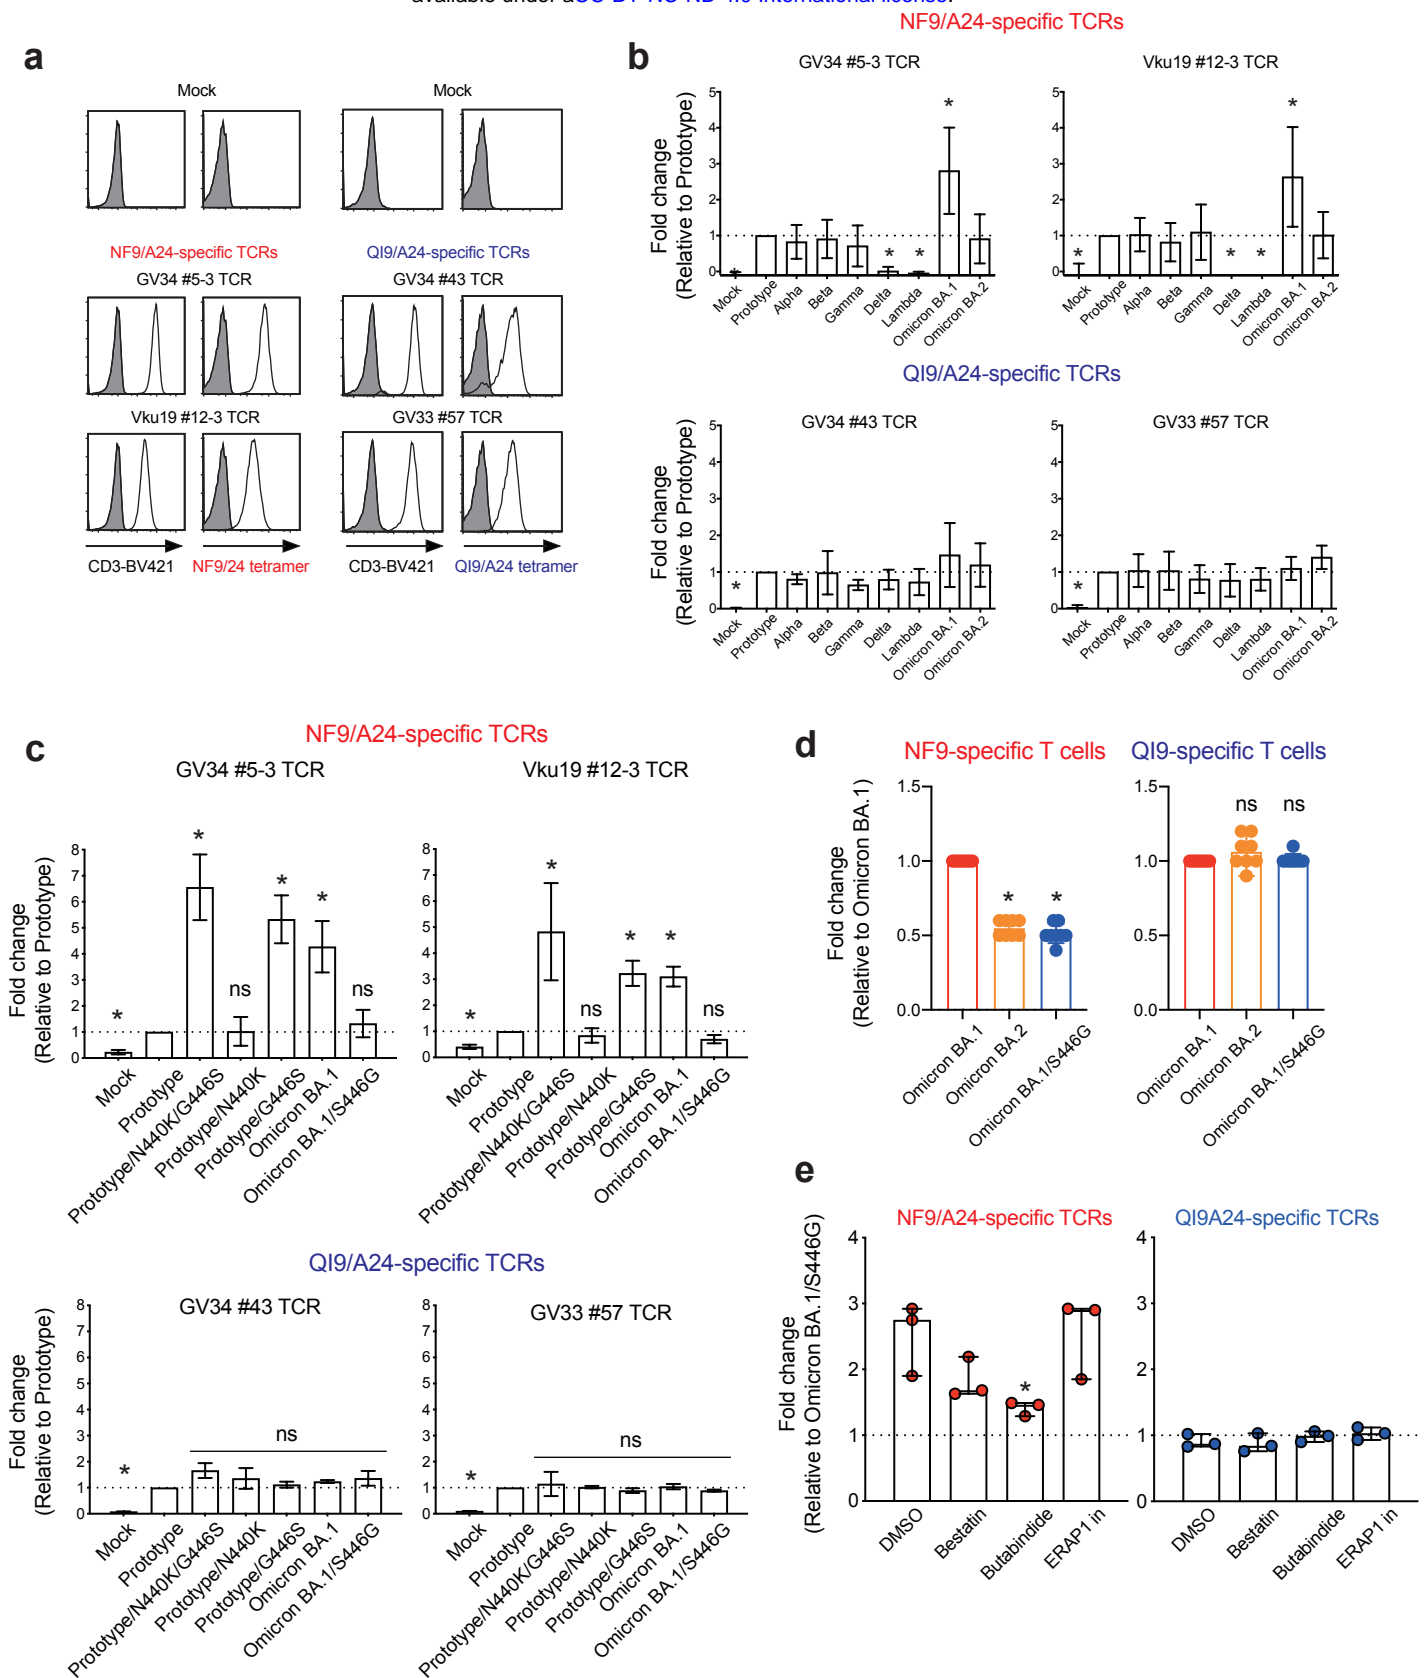

# Fig. 4

bioRxiv preprint doi: <https://doi.org/10.1101/2022.04.17.488095>; this version posted April 18, 2022. The copyright holder for this preprint (which was not certified by peer review) is the author/funder, who has granted bioRxiv a license to display the preprint in perpetuity. It is made available under a [CC-BY-NC-ND 4.0 International license](#).

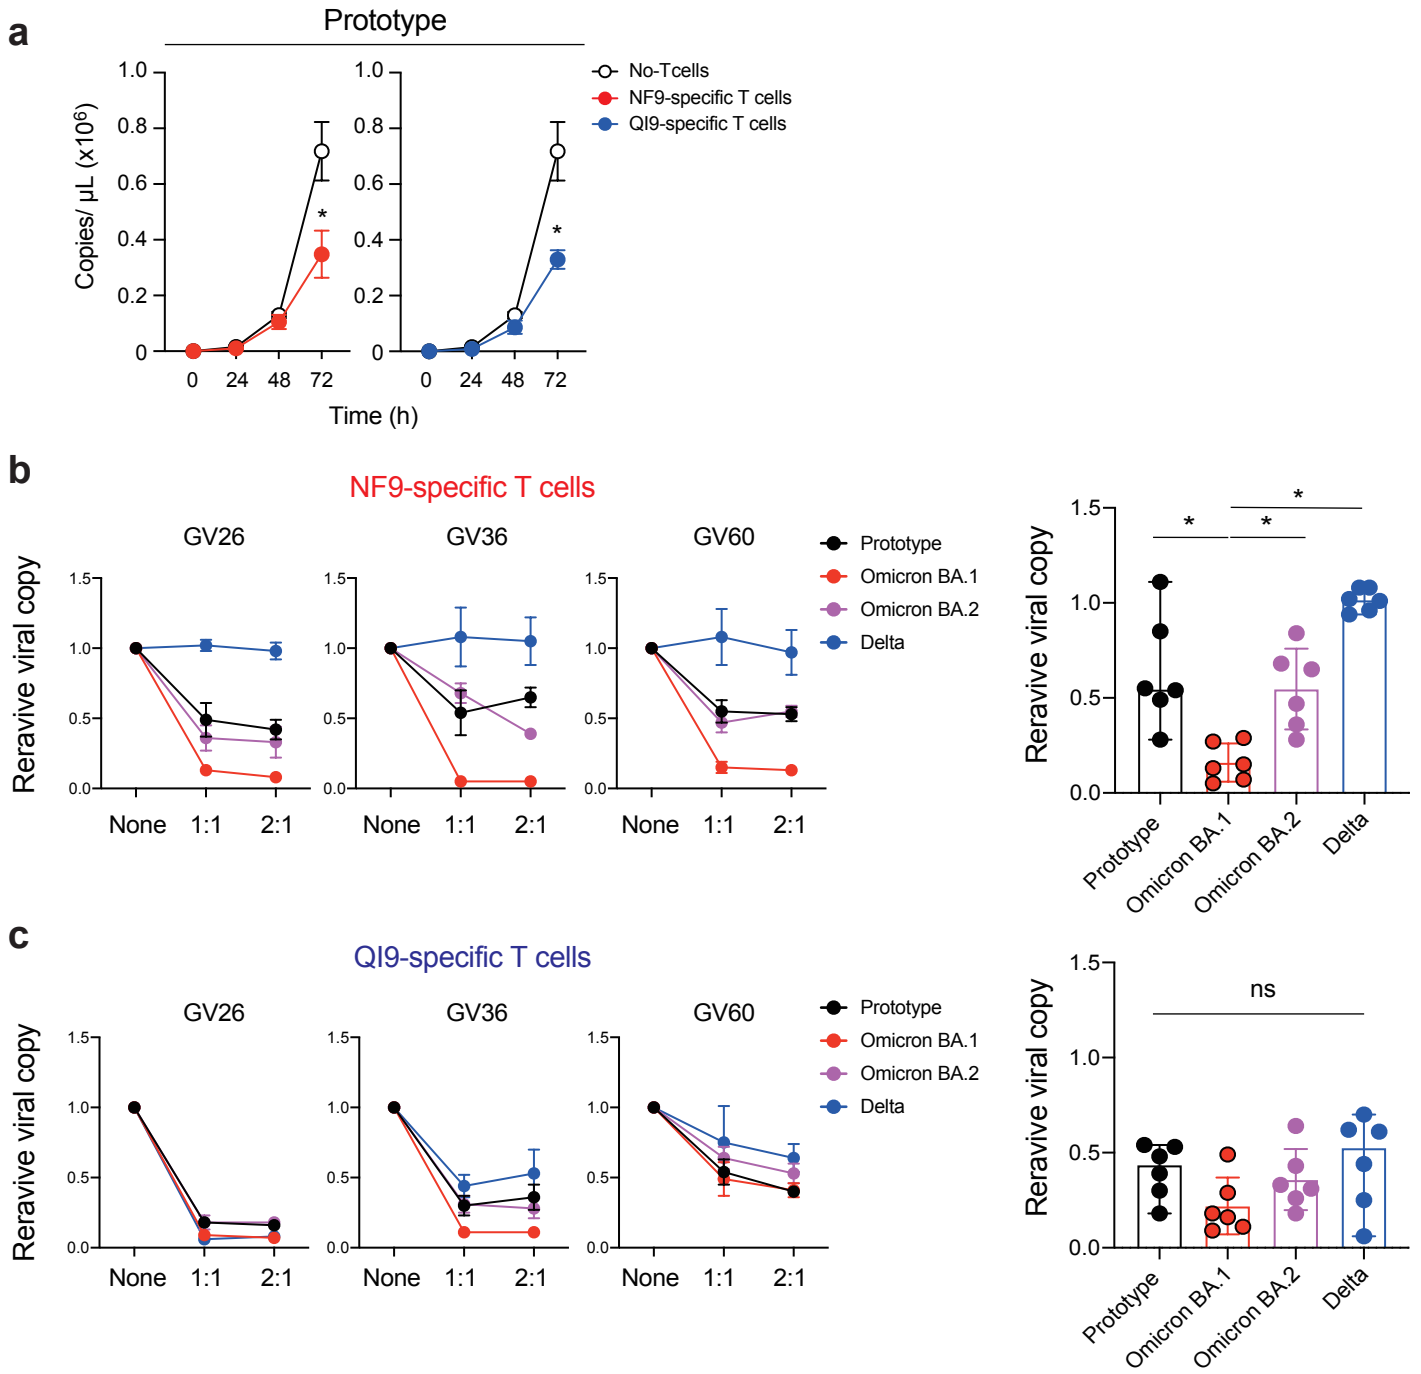

**Table 1. Binding of spike-derived epitopes to HLA-A\*24:02**

| <b>Epitope name</b> | <b>Position</b>        | <b>Sequence</b> | <b>Normalized Log Kd</b> |
|---------------------|------------------------|-----------------|--------------------------|
| RF9/A24             | S <sub>78-86</sub>     | RFDNPVLPF       | -6.04                    |
| NF9/A24             | S <sub>448-456</sub>   | NYNYLYRLF       | -6.89                    |
| QI9/A24             | S <sub>1208-1216</sub> | QYIKWPWYI       | -7.55                    |

**Table 2. Spike derived HLA-A24-restricted NF9/A24 epitopes and the N-terminal flanking region from the variant**

| <b>Flanking sequence of the NF9/A24 epitope</b>                                        | <b>Spike mutation</b> | <b>SARS-CoV-2 strain</b> |
|----------------------------------------------------------------------------------------|-----------------------|--------------------------|
| <sup>440</sup> NNLDSKV <sup>446</sup> GG <sup>448</sup> <u>NYNLYRLF</u> <sup>456</sup> | –                     | Prototype                |
| <sup>440</sup> K----- <sup>446</sup> S- <sup>448</sup> ----- <sup>456</sup>            | N440K-G446S           | Omicron BA.1             |
| <sup>440</sup> K----- <sup>446</sup> -- <sup>448</sup> ----- <sup>456</sup>            | N440K                 | Omicron BA.2             |
| <sup>440</sup> ----- <sup>446</sup> -- <sup>448</sup> ---R--- <sup>456</sup>           | L452R                 | Delta                    |
