# Supplementary material for: The SARS-CoV-2 Omicron BA.1 spike G446S potentiates HLA-A*24:02-restricted T cell immunity
Source: bioRxiv or medRxiv preprint supplement (doi:10.1101/2022.04.17.488095), 2022-04-18
Supplement: Supplementary file [file media-1.pdf]

# Extended Data Fig. 1

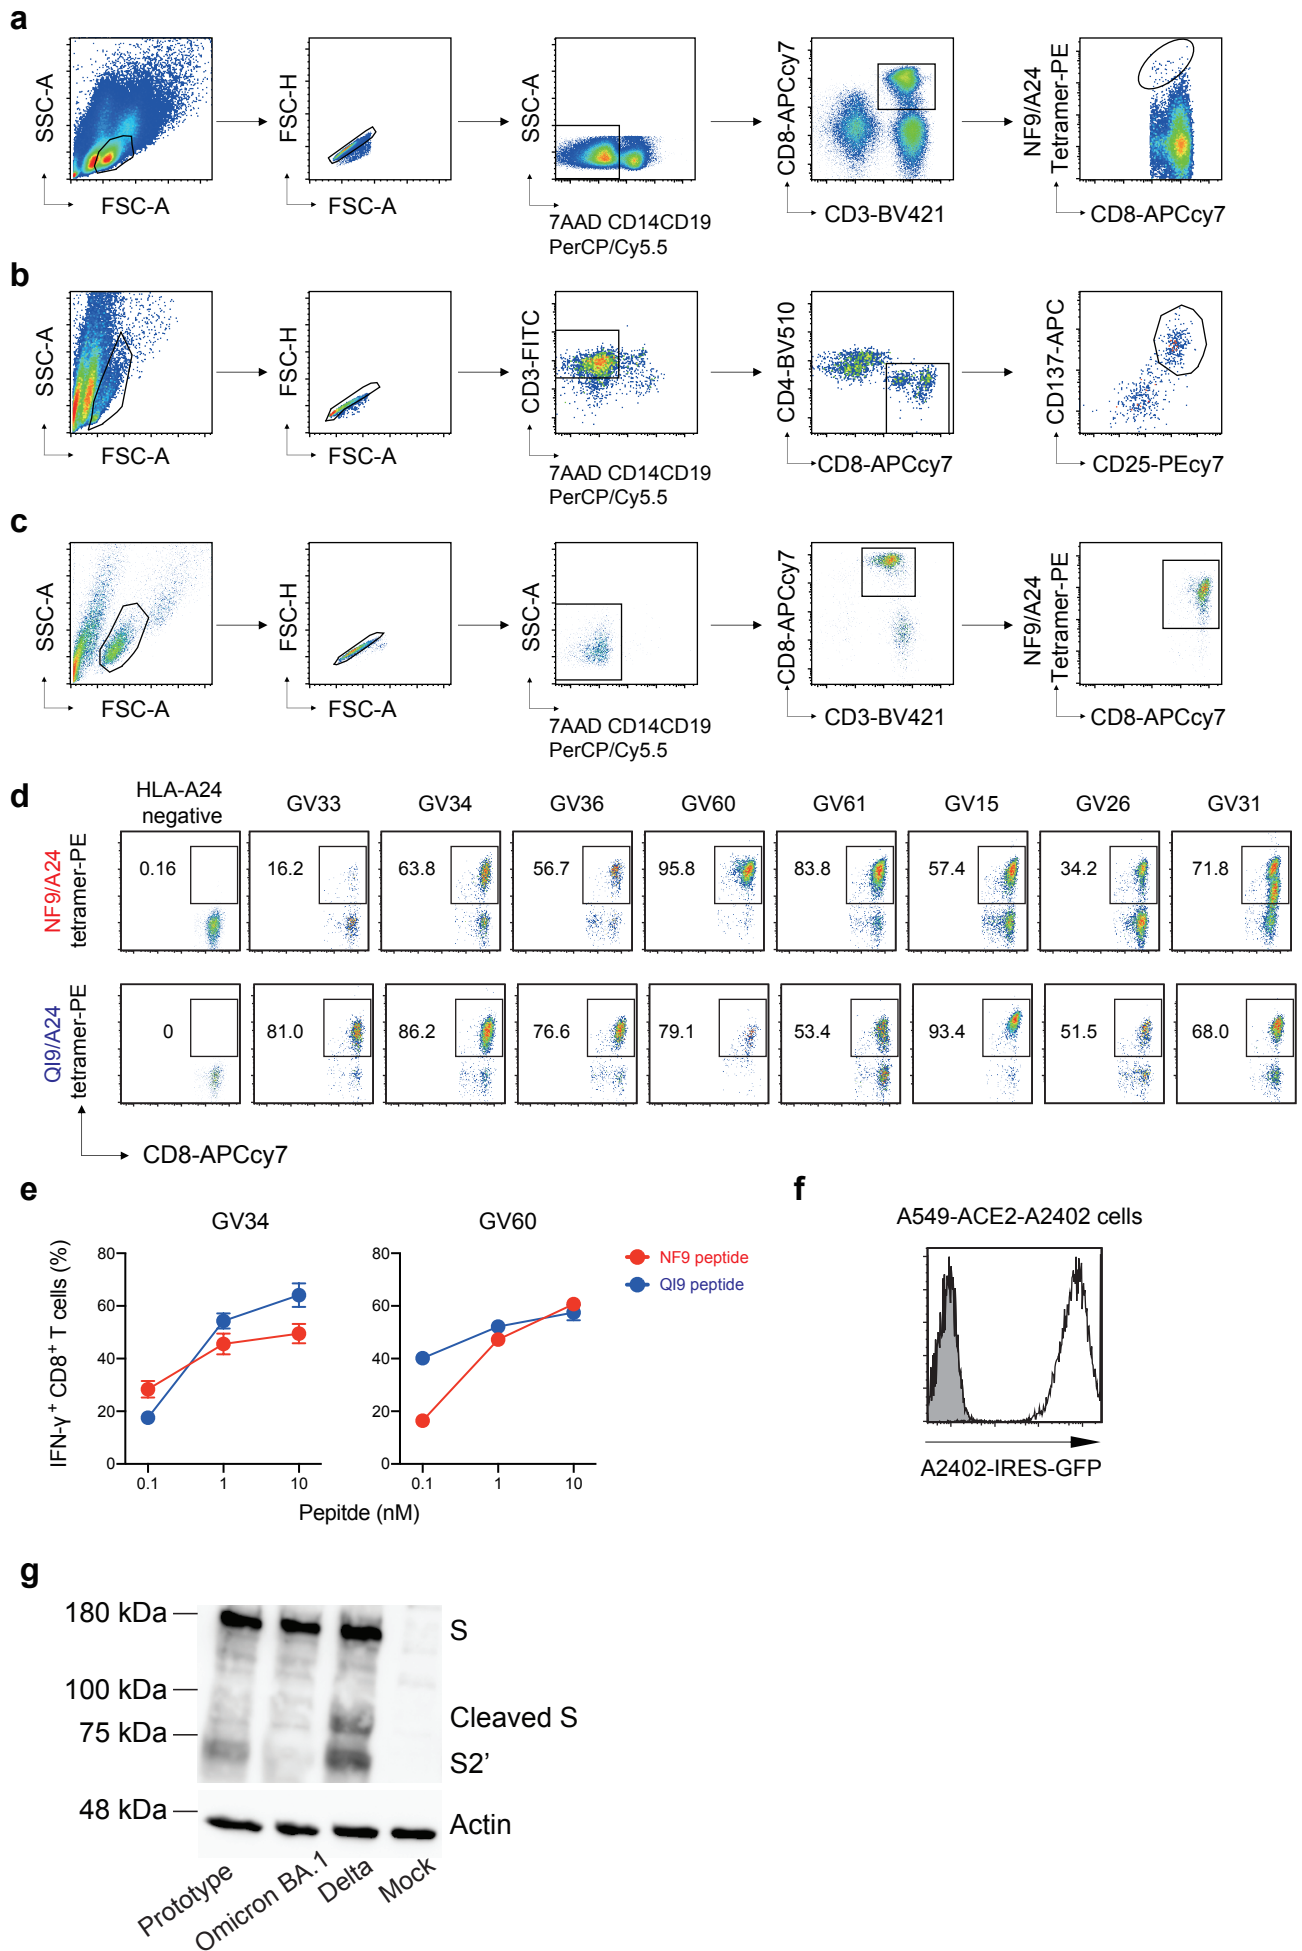

# Extended Data Fig. 2

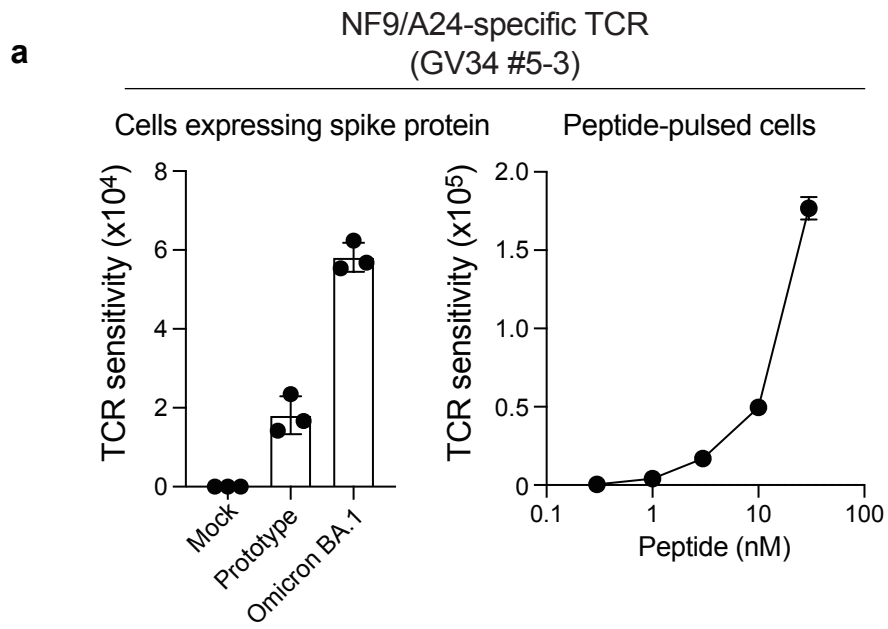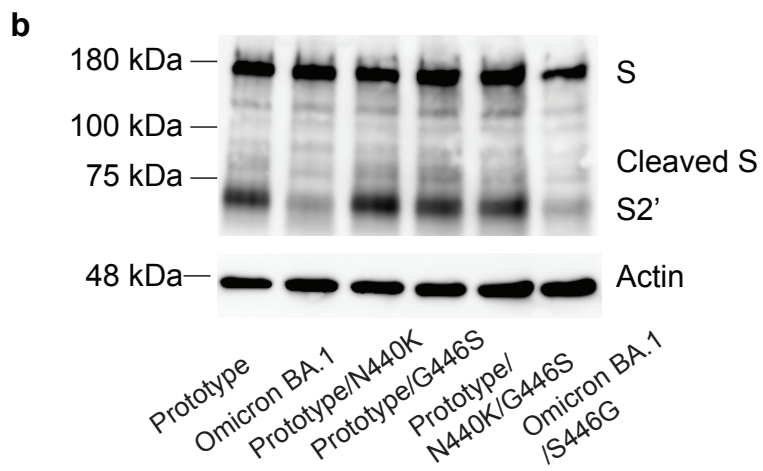

**Supplementary Table 1. Human PBMCs used in this study, related to Figure 1**

| Donor ID | Sex    | Age | HLA-A24? | vaccinated? | Days after two doses of vaccination |
|----------|--------|-----|----------|-------------|-------------------------------------|
| Vku19    | Female | 36  | Positive | BNT162b2    | 21                                  |
| GV1      | Female | 28  | Positive | BNT162b2    | 9                                   |
| GV4      | Female | 18  | Negative | BNT162b2    | 20                                  |
| GV5      | Female | 18  | Positive | BNT162b2    | 20                                  |
| GV6      | Female | 79  | Positive | BNT162b2    | 21                                  |
| GV9      | Female | 24  | Positive | BNT162b2    | 21                                  |
| GV10     | Male   | 23  | Positive | BNT162b2    | 22                                  |
| GV11     | Male   | 23  | Positive | BNT162b2    | 22                                  |
| GV12     | Female | 28  | Negative | BNT162b2    | 23                                  |
| GV13     | Male   | 22  | Positive | BNT162b2    | 21                                  |
| GV14     | Male   | 23  | Positive | BNT162b2    | 22                                  |
| GV15     | Female | 23  | Positive | BNT162b2    | 21                                  |
| GV16     | Male   | 22  | Positive | BNT162b2    | 22                                  |
| GV17     | Male   | 24  | Negative | BNT162b2    | 21                                  |
| GV19     | Male   | 24  | Positive | BNT162b2    | 22                                  |
| GV20     | Female | 24  | Positive | BNT162b2    | 22                                  |
| GV21     | Male   | 22  | Positive | BNT162b2    | 21                                  |
| GV22     | Male   | 22  | Positive | BNT162b2    | 22                                  |
| GV23     | Male   | 25  | Positive | BNT162b2    | 22                                  |
| GV24     | Male   | 23  | Positive | BNT162b2    | 22                                  |
| GV25     | Male   | 24  | Negative | BNT162b2    | 22                                  |
| GV26     | Male   | 23  | Positive | BNT162b2    | 22                                  |
| GV27     | Female | 23  | Negative | BNT162b2    | 21                                  |
| GV28     | Female | 23  | Positive | BNT162b2    | 21                                  |
| GV29     | Male   | 23  | Positive | BNT162b2    | 21                                  |
| GV31     | Male   | 23  | Positive | BNT162b2    | 22                                  |
| GV32     | Male   | 56  | Positive | BNT162b2    | 27                                  |
| GV33     | Male   | 39  | Positive | BNT162b2    | 24                                  |
| GV34     | Female | 38  | Positive | BNT162b2    | 24                                  |
| GV35     | Male   | 52  | Positive | BNT162b2    | 24                                  |
| GV36     | Male   | 39  | Positive | BNT162b2    | 24                                  |
| GV51     | Male   | 34  | Positive | BNT162b2    | 30                                  |
| GV59     | Male   | 37  | Positive | BNT162b2    | 126                                 |
| GV60     | Male   | 51  | Positive | mRNA-1273   | 116                                 |
| GV61     | Female | 36  | Positive | mRNA-1273   | 107                                 |

**Supplementary Table 2. TCR sequences specific for the NF9/A24 and QI9/A24, related to Figure 3**

| Specificity | ID          | TRAV        | TRAJ      | CDR3 $\alpha$   | TRBV        | TRBJ       | TRBD     | CDR3 $\beta$       |
|-------------|-------------|-------------|-----------|-----------------|-------------|------------|----------|--------------------|
| NF9/A24     | GV34 #2-2   | TRAV12-1*01 | TRAJ33*01 | CVVNALMDSNYQLIW | TRBV5-1*01  | TRBJ2-7*01 | TRBD1*01 | CASSLGQGYEQYF      |
|             | GV34 #5-3   | TRAV12-1*01 | TRAJ33*01 | CVVNLFDSDNYQLIW | TRBV2*01    | TRBJ2-7*01 | TRBD1*01 | CASSEGAGYEQYF      |
|             | VKU19 #12-3 | TRAV12-3*01 | TRAJ44*01 | CAFTGTASKLTF    | TRBV7-8*01  | TRBJ2-1*01 | TRBD2*02 | CASSELNEQFF        |
| QI9/A24     | GV33 #57    | TRAV3*01    | TRAJ8*01  | CAGVLFNTGFQKLVF | TRBV20-1*02 | TRBJ2-1*01 | TRBD2*01 | CSASDRGASGSFSNEQFF |
|             | GV34 #43    | TRAV21*01   | TRAJ43*01 | CAAPRYNNNDMRF   | TRBV2*01    | TRBJ2-2*01 | TRBD1*01 | CASSEGADAGELFF     |
|             | GV36 #10-2  | TRAV19*01   | TRAJ9*01  | CALSEPPSGGKTIF  | TRBV20-1*01 | TRBJ1-1*01 | TRBD1*01 | CSARGQGLNTEAFF     |

**Supplementary Table 3. Primers for the construction of spike derivatives, related to Figures 3**

| Product            |             | Primer name     | Sequence (5'-to-3')                    |
|--------------------|-------------|-----------------|----------------------------------------|
| Prototype spike    | N440K       | N440K Fwd       | CAGCAACAAGCTGGACAGCAAGGTGG             |
|                    |             | N440K Rev       | CTGTCCAGCTTGTTGCTGTTCCAGGC             |
|                    | N440K G446S | N440K G446S Fwd | GCAACAAGCTGGACAGCAAGGTGTCCGGCAACTACAAC |
|                    |             | N440K G446S Rev | GTTGCCGGACACCTTGCTGTCCAGCTTGTGCTGTTCC  |
|                    | G446S       | G446S Fwd       | CAAGGTGTCCGGCAACTACAACCTCCTC           |
|                    |             | G446S Rev       | GTAGTTGCCGGACACCTTGCTGTCCAG            |
| Omicron BA.1 spike | S446G       | S446G Fwd       | GACAGCAAGGTGGAGGCAACTACA               |
|                    |             | S446G Rev       | GCCTCCACCTTGCTGTCCAGCTTG               |
